# Supplementary material for: DNA methylation regulates discrimination of enhancers from promoters through a H3K4me1-H3K4me3 seesaw mechanism
Source: PubMed Central journal article supplement (PMC5727985; doi:10.1186/s12864-017-4353-7), 2017-12-12

# DNA methylation regulates discrimination of enhancers from promoters through a H3K4me1-H3K4me3 seesaw mechanism

Ali Sharifi-Zarchi<sup>1,2,3,4\*</sup>, Daniela Gerovska<sup>5\*</sup>, Kenjiro Adachi<sup>6</sup>, Mehdi Totonchi<sup>3</sup>, Hamid Pezeshk<sup>7,8</sup>, Ryan J. Taft<sup>9</sup>, Hans R. Schöler<sup>6,10</sup>, Hamidreza Chitsaz<sup>2</sup>, Mehdi Sadeghi<sup>8,11</sup>, Hossein Baharvand<sup>3,12#</sup>, Marcos J. Araúzo-Bravo<sup>5,13,14#</sup>

<sup>1</sup> Department of Bioinformatics, Institute of Biochemistry and Biophysics, University of Tehran, Tehran, Iran

<sup>2</sup> Computer Science Department, Colorado State University, Fort Collins, Colorado, USA

<sup>3</sup> Department of Stem Cells and Developmental Biology at Cell Science Research Center, Royan Institute for Stem Cell Biology and Technology, ACECR, Tehran, Iran

<sup>4</sup> Department of Computer Engineering, Sharif University of Technology, Tehran, Iran

<sup>5</sup> Computational Biology and Systems Biomedicine, Biodonostia Health Research Institute, 20014 San Sebastián, Spain

<sup>6</sup> Department of Cell and Developmental Biology, Max Planck Institute for Molecular Biomedicine, Münster, Germany

<sup>7</sup> School of Mathematics, Statistics and Computer Science, College of Science, University of Tehran, Tehran, Iran

<sup>8</sup> School of Biological Sciences, Institute for Research in Fundamental Sciences (IPM), Tehran, Iran

<sup>9</sup> Division of Genomics and Computational Biology, Institute for Molecular Bioscience, The University of Queensland, Brisbane, Australia

<sup>10</sup> Medical Faculty, University of Münster, Münster, Germany

<sup>11</sup> National Institute of Genetic Engineering and Biotechnology (NIGEB), Tehran, Iran

<sup>12</sup> Department of Developmental Biology, University of Science and Culture, ACECR, Tehran, Iran

<sup>13</sup> Computational Biology and Bioinformatics Group, Max Planck Institute for Molecular Biomedicine, Münster, Germany

<sup>14</sup> IKERBASQUE, Basque Foundation for Science, 48011 Bilbao, Spain

\* These authors contributed equally

# Corresponding authors

E-mail: baharvand@royaninstitute.org (HB), mararabra@yahoo.co.uk (MJA-B)

## Supplementary material captions

**Fig. S1 Correlation of chromatin marks and gene transcription regulators with DNA methylation in distal putative enhancers.** The distal putative enhancers (that are located outside gene coding regions, and have a distance of minimum 3 kb with the nearest TSS) are split into **(a)** DNA hypermethylated (DNA methylation  $> 0.5$ ) and **(b)** DNA hypomethylated (DNA methylation  $\leq 0.5$ ) groups. In each DNA methylation group, distal enhancers are classified based on their genomic location (rows). For each class, Spearman's rank correlations between DNA methylation of ESCs and 9 different chromatin marks, the repressive histone 3 (H3), the gene transcription marker RNA polymerase 2 (Pol2), the enhancer marker histone acetyltransferase P300, and insulator marker CCCTC-binding factor are presented in columns. Red, white and blue colors show positive, null and negative correlations, respectively.

**Fig. S2 Correlation of chromatin marks and gene transcription regulators with DNA methylation in 200 bp windows.** The putative enhancers and promoter are split into **(a)** DNA hypermethylated (DNA methylation  $> 0.5$ ) and **(b)** DNA hypomethylated (DNA methylation  $\leq 0.5$ ) groups. The DNA methylation and enrichment of chromatin marks are measured within a 200 bp window ( $\pm 100$  bp) around the TSS or putative enhancer location.

**Fig. S3 Correlation of chromatin marks and gene transcription regulators with DNA methylation in 400 bp windows.** The putative enhancers and promoter are split into **(a)** DNA hypermethylated (DNA methylation  $> 0.5$ ) and **(b)** DNA hypomethylated (DNA methylation  $\leq 0.5$ ) groups. The DNA methylation and enrichment of chromatin marks are measured within a 400 bp window ( $\pm 200$  bp) around the TSS or putative enhancer location.

**Fig S4. Proximal and distal H3K27me3 and H3K4me3 cell-type specific peaks in WT and *Dnmt1* KO MEF cells.**

Figure S1

**a**

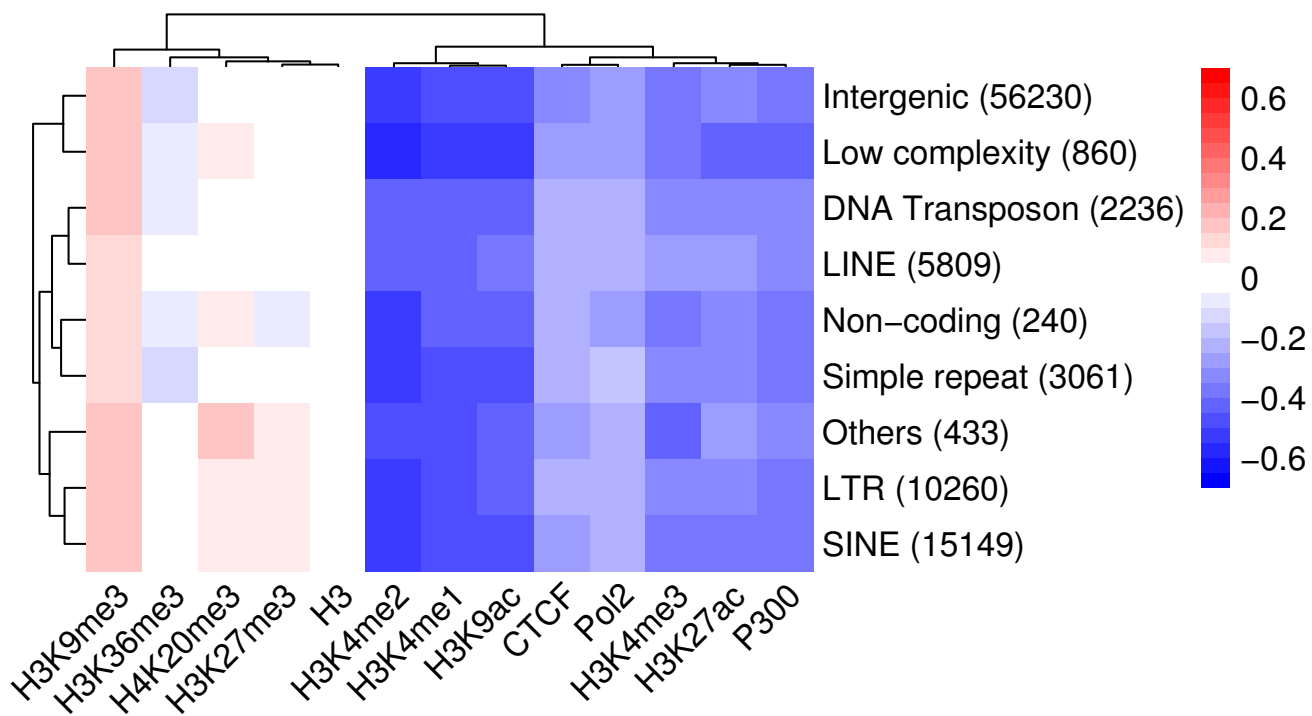

**b**

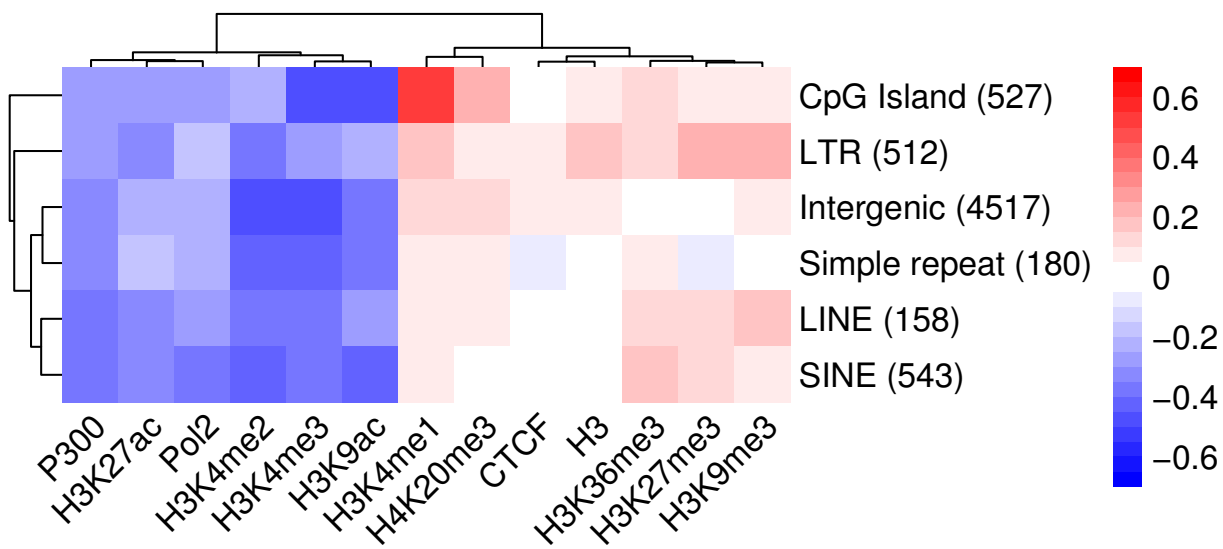

Figure S2

**a**

Hypermethylated (DNA Methylation > 50%)

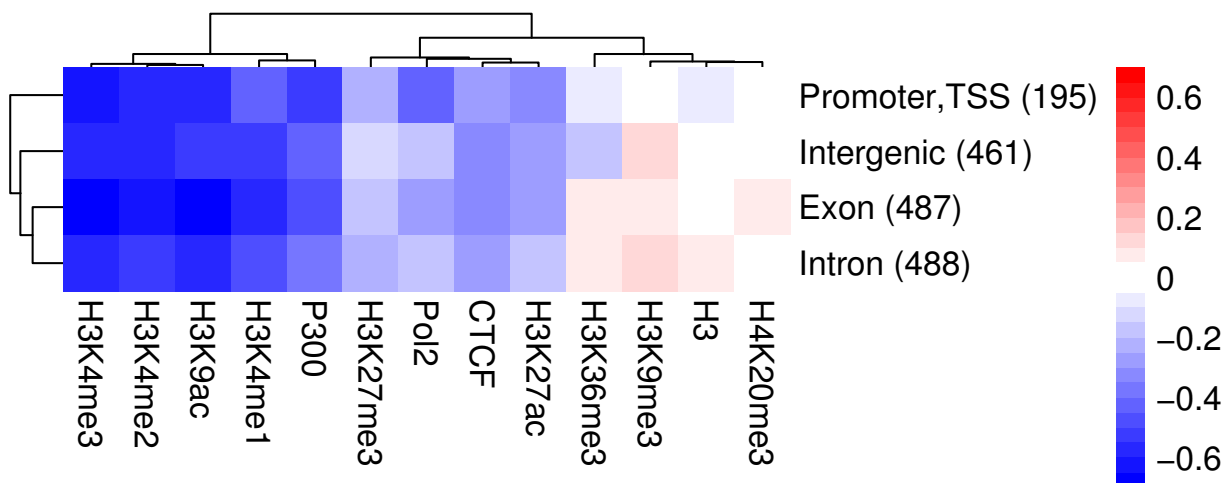

**b**

Hypomethylated (DNA Methylation ≤ 50%)

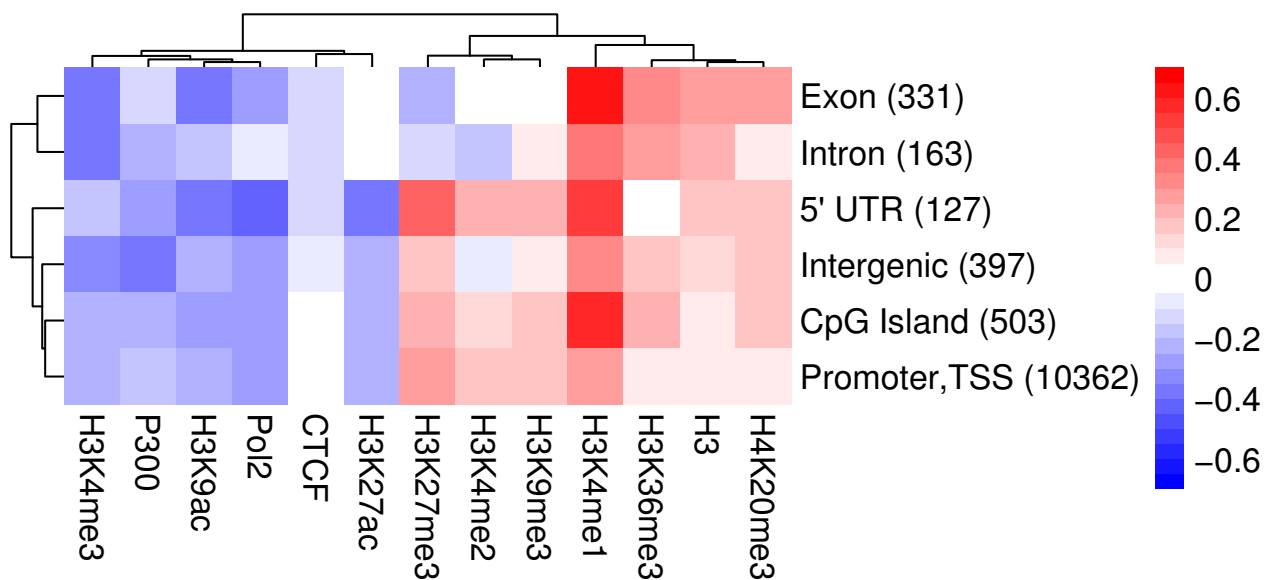

Figure S3

**a**

Hypermethylated (DNA Methylation > 50%)

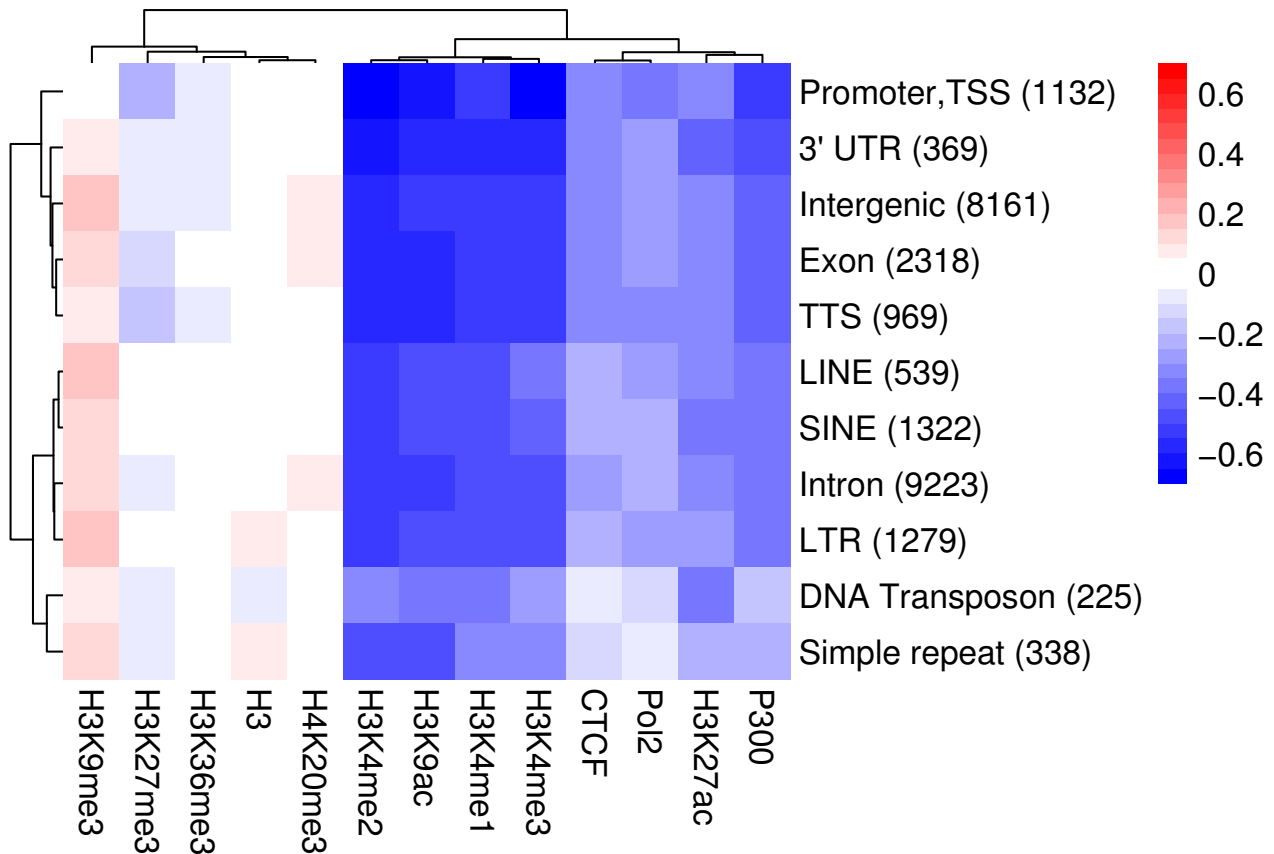

**b**

Hypomethylated (DNA Methylation  $\leq$  50%)

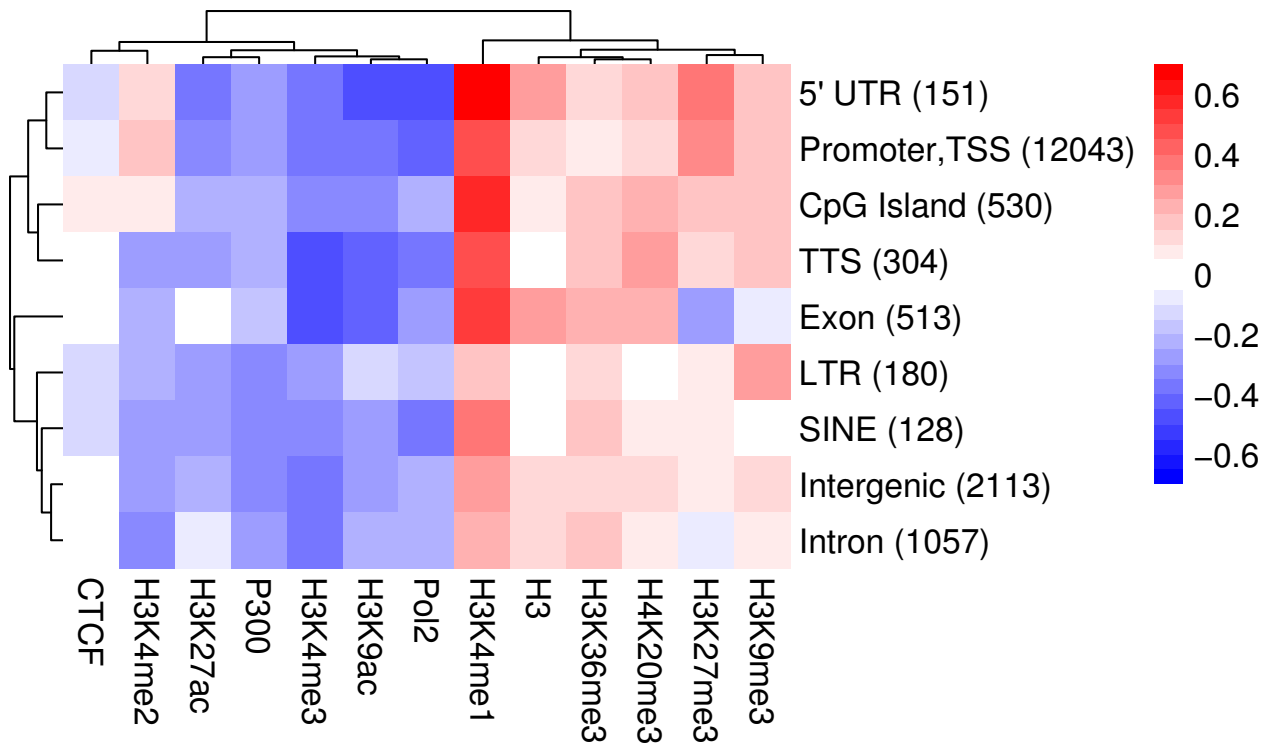

Figure S4

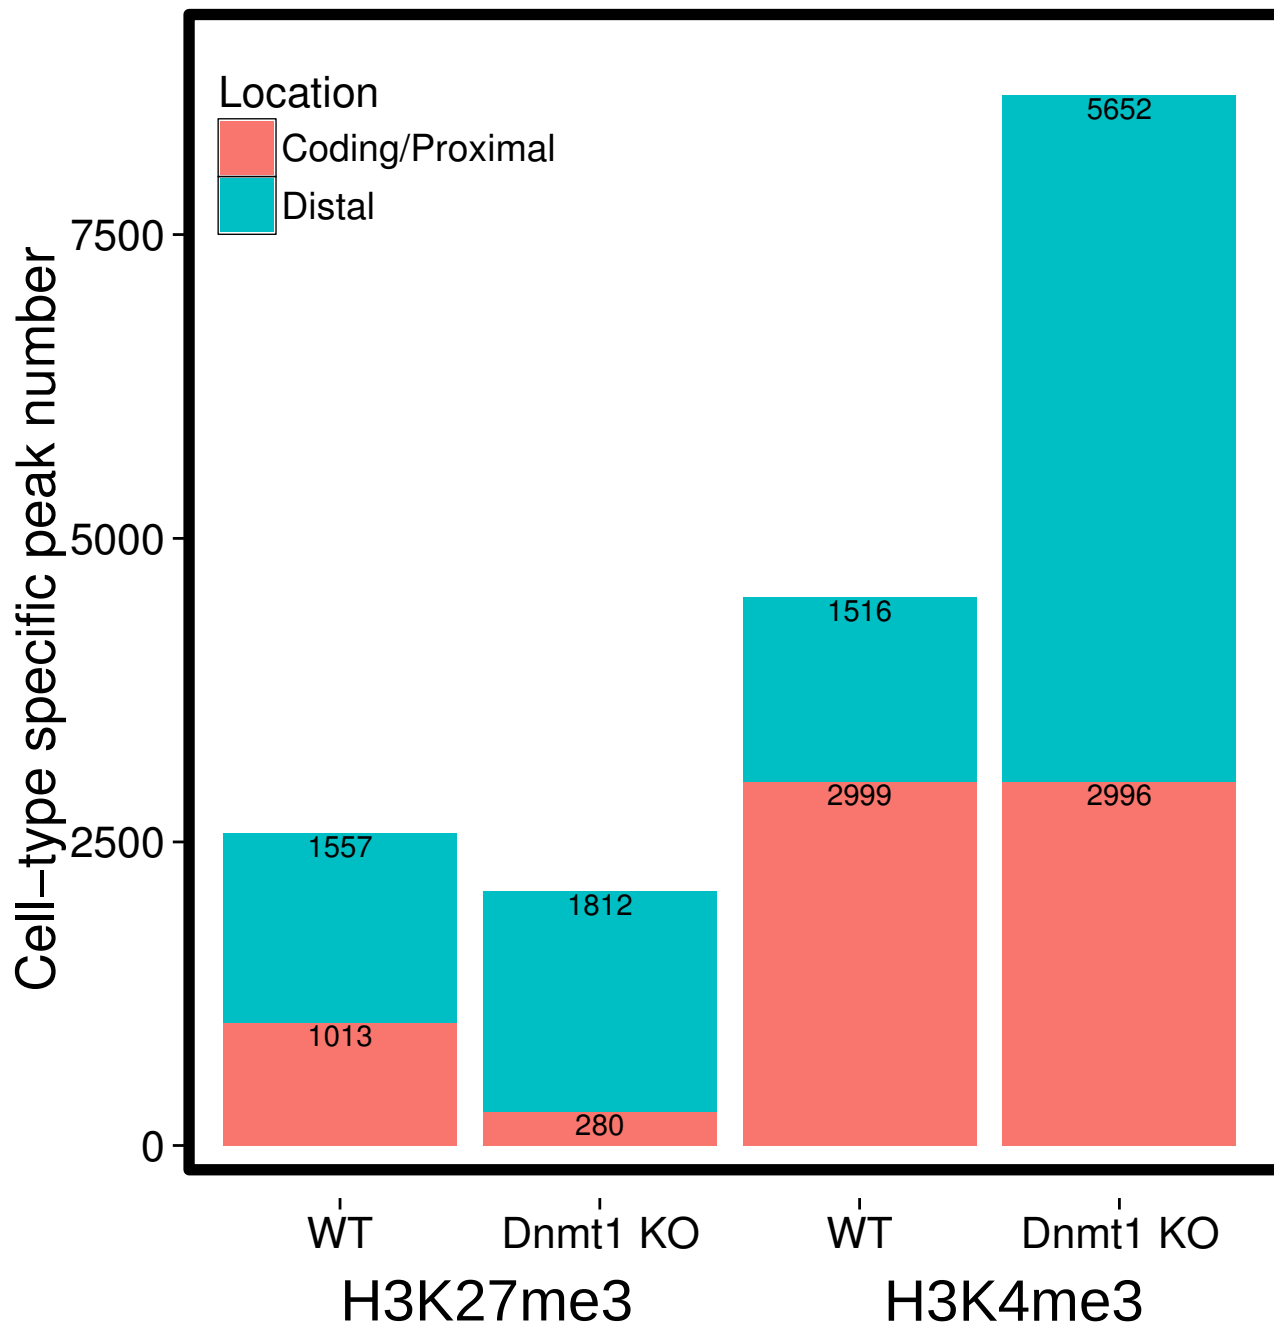

Supplement: 12864_2017_4353_MOESM1_ESM.pdf [file 12864_2017_4353_MOESM1_ESM.pdf]
